# Supplementary material
Source: ML conference proceedings conference paper supplement (https://openreview.net/forum?id=fpElyckKkd)
Supplement: supplementary_material [file attachment]

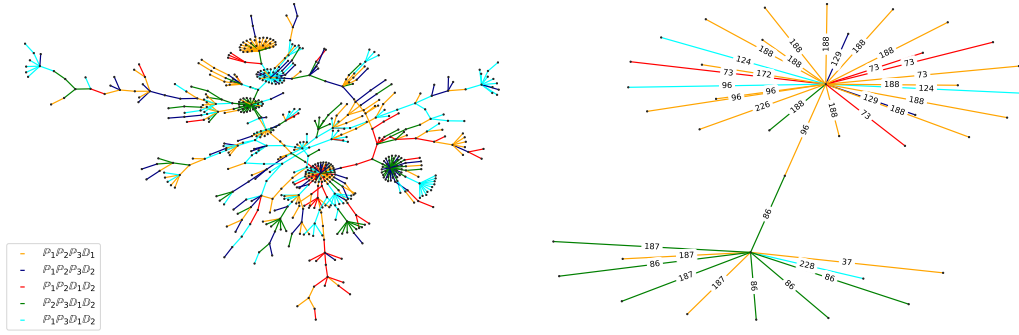

Figure 1: More examples of the connected component on FB15K-237.

| Model                 | WN18RR                     |            | FB15K-237                  |            |
|-----------------------|----------------------------|------------|----------------------------|------------|
|                       | embedding dim              | Model Size | Embedding Dim              | Model Size |
| TransE/DistMult/ConvE | tuned from {128, 256, 512} | max 20.97M | tuned from {128, 256, 512} | max 7.57M  |
| BoxE/MurP/TuckER      | 500                        | 20.48M     | 500                        | 7.39M      |
| RotE/RotH             | 500                        | 20.49M     | 500                        | 7.63M      |
| QuatE                 | 1000                       | 40.95M     | 4000                       | 58.64M     |
| RotatE                | 1000                       | 40.95M     | 2000                       | 29.32M     |
| ComplEx-N3            | 1000                       | 40.95M     | 1000                       | 14.78M     |
| <b>Ours</b>           | 500                        | 20.49M     | 500                        | 7.63M      |

Table 1: Model size comparison on the relational graph link prediction task.

## 1 Additional Details on the Relational Graph Link Prediction Task

### 1.1 Related work on relational graph link prediction

A number of embedding techniques have been explored for relational graphs. Representative Euclidean models are RESCAL [8], DistMult [12], TransE [4], TuckER [3], ConvE [6], RotE [5], R-GCN [9], and BoxE [1]. Complex/Hypercomplex number models such as ComplEx [11; 7], RotatE [10], QuatE [13] have shown better capability in modeling asymmetric relations. Recently, learning relational graph embeddings in hyperbolic spaces has gained increasing popularity. Hyperbolic models such as MurP [2] and RotH [5] can effectively capture the hierarchical relational patterns in relational graphs. As can be concluded from the literature, it is important for the models to have the capability to capture the relational and structural patterns in real-world relational graphs. However, current models usually focus on specific patterns and lose sight of the big picture. Our model is capable of modeling not only different relational patterns (symmetric, antisymmetric, and inversive, etc.) but also various structural patterns (hierarchical, cyclical, etc) of relational graphs for more effective link prediction.

### 1.2 Model size comparison

As shown in Table 1, we see that the introduced trainable parameters in the gating network can be ignored as compared with RotE/RotH. Compared with QuatE and RotatE, our method uses half of their parameters but obtains better results.

## References

- [1] Ralph Abboud, Ismail Ceylan, Thomas Lukasiewicz, and Tommaso Salvatori. Boxe: A box embedding model for knowledge base completion. *Advances in Neural Information Processing Systems*, 33, 2020.
- [2] Ivana Balazevic, Carl Allen, and Timothy Hospedales. Multi-relational poincaré graph embeddings. In *Advances in Neural Information Processing Systems*, pages 4463–4473, 2019.

- 24 [3] Ivana Balazevic, Carl Allen, and Timothy Hospedales. Tucker: Tensor factorization for knowledge graph  
25 completion. In *Proceedings of the 2019 Conference on Empirical Methods in Natural Language Processing*  
26 *and the 9th International Joint Conference on Natural Language Processing (EMNLP-IJCNLP)*, pages  
27 5188–5197, 2019. [1](#)
- 28 [4] Antoine Bordes, Nicolas Usunier, Alberto Garcia-Duran, Jason Weston, and Oksana Yakhnenko. Translat-  
29 ing embeddings for modeling multi-relational data. *Advances in neural information processing systems*,  
30 26:2787–2795, 2013. [1](#)
- 31 [5] Ines Chami, Adva Wolf, Da-Cheng Juan, Frederic Sala, Sujith Ravi, and Christopher Ré. Low-dimensional  
32 hyperbolic knowledge graph embeddings. In *Proceedings of the 58th Annual Meeting of the Association*  
33 *for Computational Linguistics*, pages 6901–6914, Online, July 2020. Association for Computational  
34 Linguistics. [1](#)
- 35 [6] Tim Dettmers, Pasquale Minervini, Pontus Stenetorp, and Sebastian Riedel. Convolutional 2d knowledge  
36 graph embeddings. In *Proceedings of the AAAI Conference on Artificial Intelligence*, volume 32, 2018. [1](#)
- 37 [7] Timothee Lacroix, Nicolas Usunier, and Guillaume Obozinski. Canonical tensor decomposition for  
38 knowledge base completion. In *International Conference on Machine Learning*, pages 2863–2872, 2018. [1](#)
- 39 [8] Maximilian Nickel, Volker Tresp, and Hans-Peter Kriegel. A three-way model for collective learning on  
40 multi-relational data. In *Icml*, 2011. [1](#)
- 41 [9] Michael Schlichtkrull, Thomas N Kipf, Peter Bloem, Rianne Van Den Berg, Ivan Titov, and Max Welling.  
42 Modeling relational data with graph convolutional networks. In *European semantic web conference*, pages  
43 593–607. Springer, 2018. [1](#)
- 44 [10] Zhiqing Sun, Zhi-Hong Deng, Jian-Yun Nie, and Jian Tang. Rotate: Knowledge graph embedding by  
45 relational rotation in complex space. In *International Conference on Learning Representations*, 2019. [1](#)
- 46 [11] Théo Trouillon, Johannes Welbl, Sebastian Riedel, Éric Gaussier, and Guillaume Bouchard. Complex  
47 embeddings for simple link prediction. In *International Conference on Machine Learning*, pages 2071–  
48 2080. PMLR, 2016. [1](#)
- 49 [12] Bishan Yang, Wen-tau Yih, Xiaodong He, Jianfeng Gao, and Li Deng. Embedding entities and relations  
50 for learning and inference in knowledge bases. *ICLR*, 2015. [1](#)
- 51 [13] Shuai Zhang, Yi Tay, Lina Yao, and Qi Liu. Quaternion knowledge graph embeddings. In *Advances in*  
52 *Neural Information Processing Systems*, pages 2735–2745, 2019. [1](#)
